# Supplementary material for: Ultrathin MXene/aramid nanofiber composite paper with excellent mechanical properties for efficient electromagnetic interference shielding
Source: Royal Society of Chemistry journal article supplement (doi:10.1039/c9nr07331k), 2019-01-01
Supplement: c9nr07331k1.pdf [file c9nr07331k1.pdf]

## Supporting Information

### **Ultrathin MXene/Aramid Nanofiber Composite Paper with Excellent Mechanical Property for Efficient Electromagnetic Interference Shielding**

*Fan Xie<sup>a</sup>, Fengfeng Jia<sup>a</sup>, Longhai Zhuo<sup>a</sup>, Zhaoqing Lu<sup>a,\*</sup>, Lianmeng Si<sup>a</sup>, Jizhen Huang<sup>a</sup>, Meiyun Zhang<sup>a</sup>, Qin*

*Ma<sup>a</sup>*

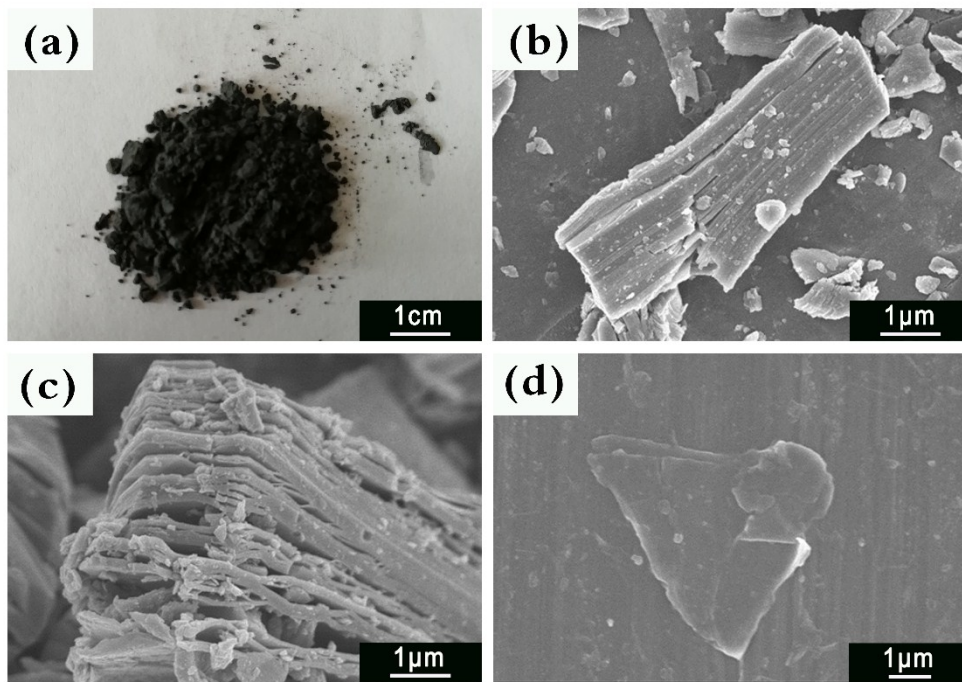

**Figure S1.** (a) Digital image of  $\text{Ti}_3\text{AlC}_2$  power. (b) SEM image of  $\text{Ti}_3\text{AlC}_2$  power. (c) SEM image of m-d- $\text{Ti}_3\text{C}_2\text{T}_x$ .

(d) SEM image of d- $\text{Ti}_3\text{C}_2\text{T}_x$ .

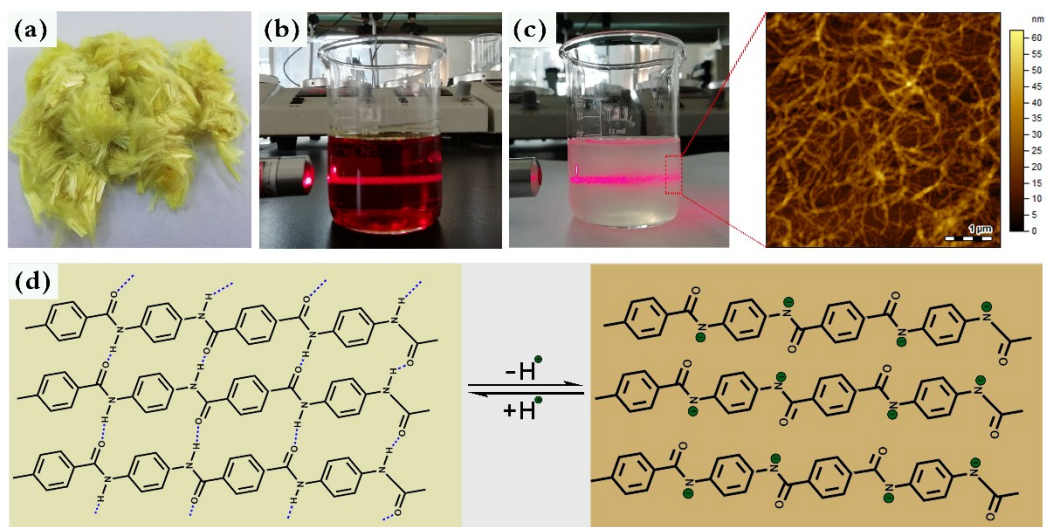

**Figure S2.** (a) Digital image of PPTA fibers. (b) Tyndall effect of ANFs/DMSO/KOH system. (c) The Tyndall effect of ANFs/water system and AFM micrograph of ANFs. (d) Deprotonation process of PPTA fibers.

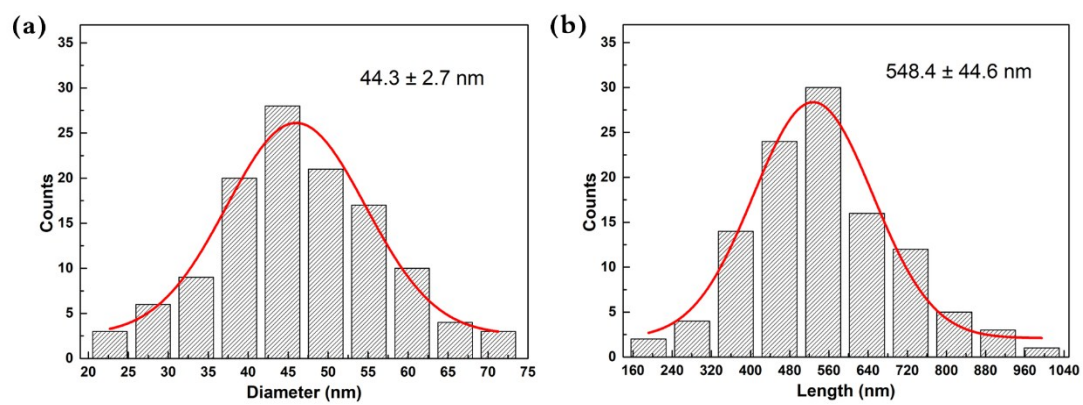

**Figure S3.** (a)The diameter distribution and (b) the length distribution of ANFs.

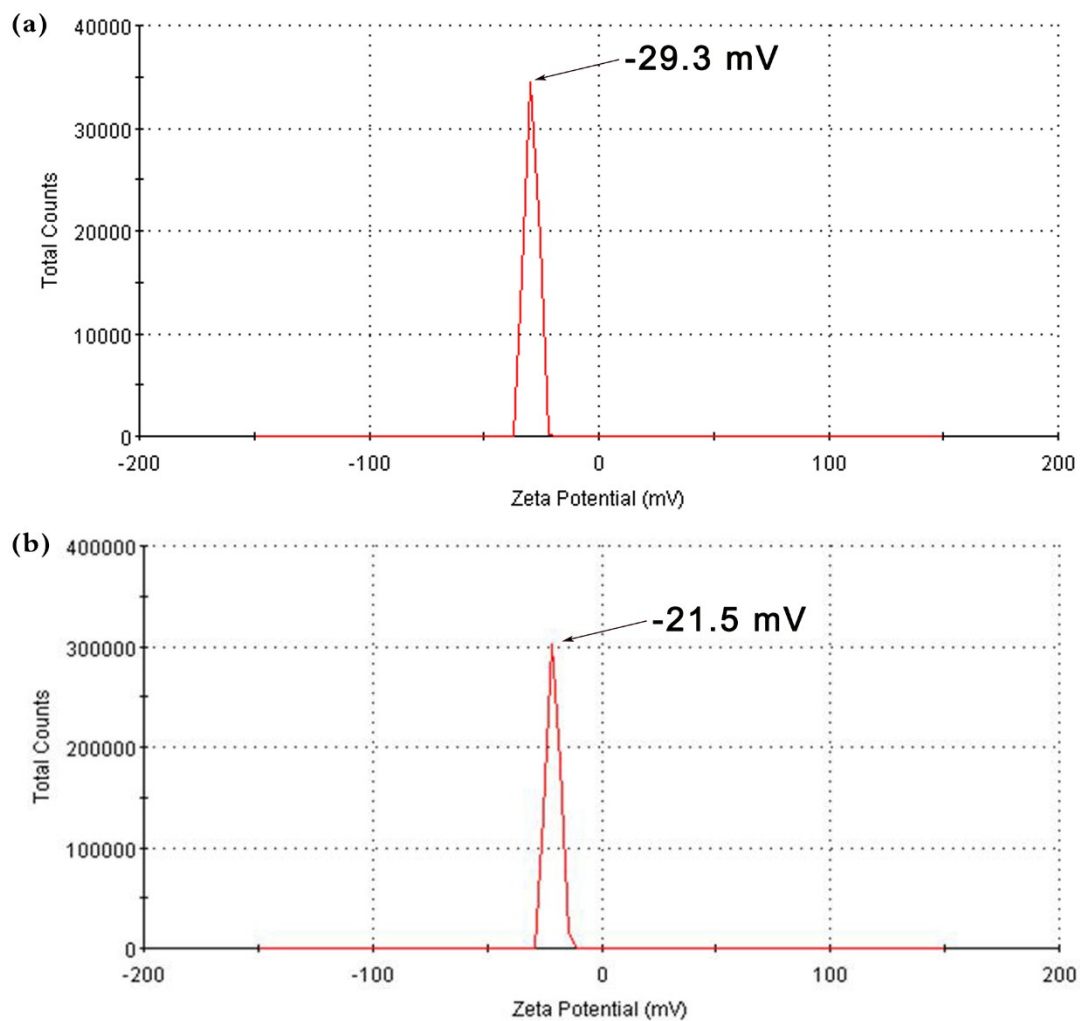

**Figure S4.** (a) Surface Zeta potential of ANFs at pH 7. (b) Surface Zeta potential of d-Ti<sub>3</sub>C<sub>2</sub>T<sub>x</sub> flakes at pH 7.

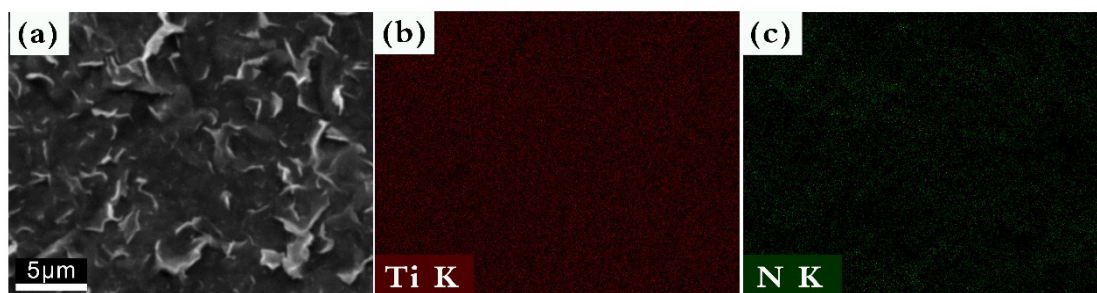

**Figure S5.** (a) Surface image of d-Ti<sub>3</sub>C<sub>2</sub>T<sub>x</sub>/ANFs composite paper (b) EDS mapping of d-Ti<sub>3</sub>C<sub>2</sub>T<sub>x</sub>/ANFs composite paper (element Ti) indicating the evenly dispersion of d-Ti<sub>3</sub>C<sub>2</sub>T<sub>x</sub>. (c) EDS mapping of d-Ti<sub>3</sub>C<sub>2</sub>T<sub>x</sub>/ANFs composite paper (element N) indicating the evenly dispersion of ANFs.

**Table S1.** Basic parameters of the d-Ti<sub>3</sub>C<sub>2</sub>T<sub>x</sub>/ANFs composite paper.

|   | <b>Samples</b>                                                | <b>Thickness<br/>(<math>\mu\text{m}</math>)</b> | <b>Density<br/>(<math>\text{g}/\text{cm}^3</math>)</b> | <b>Resistivity<br/>(<math>\text{m}\Omega\cdot\text{cm}</math>)</b> | <b>Conductivity<br/>(<math>\text{S}\cdot\text{cm}^{-1}</math>)</b> |
|---|---------------------------------------------------------------|-------------------------------------------------|--------------------------------------------------------|--------------------------------------------------------------------|--------------------------------------------------------------------|
| 1 | 10 wt% d-Ti <sub>3</sub> C <sub>2</sub> T <sub>x</sub> /ANFs  | 21 $\pm$ 1.3                                    | 0.910                                                  | 3389.333                                                           | 0.295                                                              |
| 2 | 20 wt% d-Ti <sub>3</sub> C <sub>2</sub> T <sub>x</sub> /ANFs  | 23 $\pm$ 1.9                                    | 0.997                                                  | 101.903                                                            | 9.813                                                              |
| 3 | 40 wt% d-Ti <sub>3</sub> C <sub>2</sub> T <sub>x</sub> /ANFs  | 22 $\pm$ 2.4                                    | 1.188                                                  | 40.280                                                             | 24.826                                                             |
| 4 | 50 wt % d-Ti <sub>3</sub> C <sub>2</sub> T <sub>x</sub> /ANFs | 20 $\pm$ 1.4                                    | 1.280                                                  | 14.367                                                             | 69.606                                                             |
| 5 | 60 wt % d-Ti <sub>3</sub> C <sub>2</sub> T <sub>x</sub> /ANFs | 17 $\pm$ 1.5                                    | 1.255                                                  | 10.032                                                             | 99.684                                                             |
| 6 | 80 wt % d-Ti <sub>3</sub> C <sub>2</sub> T <sub>x</sub> /ANFs | 20 $\pm$ 1.3                                    | 1.453                                                  | 5.768                                                              | 173.360                                                            |
| 7 | 90 wt% d-Ti <sub>3</sub> C <sub>2</sub> T <sub>x</sub> /ANFs  | 15 $\pm$ 2.0                                    | 1.638                                                  | 1.592                                                              | 628.272                                                            |
| 8 | 100 wt % d-Ti <sub>3</sub> C <sub>2</sub> T <sub>x</sub>      | /                                               | 1.852                                                  | /                                                                  | 3118.820                                                           |

**Table S2.** Mechanical properties of the d-Ti<sub>3</sub>C<sub>2</sub>T<sub>x</sub>/ANFs composite paper.

|   | <b>Materials</b>                                             | <b>Tensile strength<br/>(MPa)</b>   | <b>Strain at fracture<br/>(%)</b> | <b>Young's modulus<br/>(GPa)</b> |
|---|--------------------------------------------------------------|-------------------------------------|-----------------------------------|----------------------------------|
| 1 | ANFs                                                         | 164.04                              | 7.30                              | 2.35                             |
| 2 | 10 wt% d-Ti <sub>3</sub> C <sub>2</sub> T <sub>x</sub> /ANFs | 197.09                              | 9.80                              | 2.01                             |
| 3 | 20 wt% d-Ti <sub>3</sub> C <sub>2</sub> T <sub>x</sub> /ANFs | 158.53                              | 8.45                              | 1.87                             |
| 4 | 40 wt% d-Ti <sub>3</sub> C <sub>2</sub> T <sub>x</sub> /ANFs | 136.55                              | 7.23                              | 1.88                             |
| 5 | 50 wt% d-Ti <sub>3</sub> C <sub>2</sub> T <sub>x</sub> /ANFs | 83.92                               | 3.96                              | 2.11                             |
| 6 | 60 wt% d-Ti <sub>3</sub> C <sub>2</sub> T <sub>x</sub> /ANFs | 80.14                               | 2.20                              | 2.64                             |
| 7 | 80 wt% d-Ti <sub>3</sub> C <sub>2</sub> T <sub>x</sub> /ANFs | 66.32                               | 1.80                              | 2.68                             |
| 8 | 90 wt% d-Ti <sub>3</sub> C <sub>2</sub> T <sub>x</sub> /ANFs | 33.07                               | 0.56                              | 2.89                             |
| 9 | 100 wt% d-Ti <sub>3</sub> C <sub>2</sub> T <sub>x</sub>      | Poor mechanical and brittle to test |                                   |                                  |



**Table S3.** EMI shielding properties of the d-Ti<sub>3</sub>C<sub>2</sub>T<sub>x</sub>/ANFs composite paper.

|   | <b>Materials</b>                                             | <b>SE<sub>Total</sub> at 12.4GHz<br/>(dB)</b> | <b>SE<sub>A</sub> at 12.4GHz<br/>(dB)</b> | <b>absorption coefficient<br/>at 12.4GHz (%)</b> |
|---|--------------------------------------------------------------|-----------------------------------------------|-------------------------------------------|--------------------------------------------------|
| 1 | 10 wt% d-Ti <sub>3</sub> C <sub>2</sub> T <sub>x</sub> /ANFs | 4.89                                          | 1.54                                      | 31.49                                            |
| 2 | 20 wt% d-Ti <sub>3</sub> C <sub>2</sub> T <sub>x</sub> /ANFs | 12.74                                         | 7.11                                      | 55.80                                            |
| 3 | 40 wt% d-Ti <sub>3</sub> C <sub>2</sub> T <sub>x</sub> /ANFs | 19.43                                         | 11.31                                     | 58.20                                            |
| 4 | 50 wt% d-Ti <sub>3</sub> C <sub>2</sub> T <sub>x</sub> /ANFs | 23.97                                         | 13.40                                     | 55.90                                            |
| 5 | 60 wt% d-Ti <sub>3</sub> C <sub>2</sub> T <sub>x</sub> /ANFs | 28.54                                         | 17.46                                     | 61.17                                            |
| 6 | 80 wt% d-Ti <sub>3</sub> C <sub>2</sub> T <sub>x</sub> /ANFs | 30.00                                         | 17.98                                     | 59.93                                            |
| 7 | 90 wt% d-Ti <sub>3</sub> C <sub>2</sub> T <sub>x</sub> /ANFs | 32.84                                         | 20.55                                     | 62.57                                            |
| 8 | 100 wt% d-Ti <sub>3</sub> C <sub>2</sub> T <sub>x</sub>      | 38.56                                         | 25.49                                     | 66.10                                            |

**Table S4.** Properties comparison of the natural nacre, the d-Ti<sub>3</sub>C<sub>2</sub>T<sub>x</sub>/ANFs composite paper and other EMI shielding materials.

| Sample | Materials                                                    | Thickness (mm) | Tensile strength (MPa) | SE (dB) | Reference |
|--------|--------------------------------------------------------------|----------------|------------------------|---------|-----------|
| [1]    | Graphene pellet                                              | 0.050          | 22                     | 60      | [1]       |
| [2]    | GP/TiO <sub>2</sub> -epoxy                                   | 0.028          | 75                     | 11      | [2]       |
| [3]    | PVA/graphene                                                 | 0.025          | 19.2                   | 25.1    | [3]       |
| [4]    | PVA/GNs/MWCNTs                                               | 0.55           | 82.6                   | 23.51   | [4]       |
| [5]    | d-Ti <sub>3</sub> C <sub>2</sub> T <sub>x</sub> /CNFs        | 0.0167         | 135.4                  | 25      | [5]       |
| [6]    | Cellulose/GP/PPy                                             | 0.1            | 90.8                   | 30      | [6]       |
| [7]    | RGO/MG/PVA                                                   | 0.36           | 62.4                   | 20.3    | [7]       |
| [8]    | PMMA/graphene                                                | 2.4            | 30                     | 19      | [8]       |
| [9]    | MWCNT/PPCP                                                   | 2              | 41                     | 47      | [9]       |
| [10]   | PANI/FMWCNT/TPU                                              | 1              | 31.75                  | 31.35   | [10]      |
| [11]   | PC/MWNT                                                      | 4              | 36.4                   | 40      | [11]      |
| [12]   | PMMA/GP                                                      | 4              | 48                     | 19      | [12]      |
| [13]   | PIPD/PDDA                                                    | 1.1            | 21.7                   | 17      | [13]      |
| [14]   | CNT-RN                                                       | 0.25           | 22.2                   | 44.7    | [14]      |
| [15]   | Graphene paper                                               | 0.013          | 54                     | 52.2    | [15]      |
| [16]   | MWCNT-PMMA                                                   | 1.1            | 23.5                   | 30      | [16]      |
| [17]   | a-MWCNT/PU                                                   | 1.5            | 58.5                   | 29      | [17]      |
| [18]   | PANI-DBSA                                                    | 0.8            | 11.04                  | 55      | [18]      |
| [19]   | MWCNT/ carbon fabrics                                        | 0.2            | 6.83                   | 38      | [19]      |
| [20]   | 20 wt% d-Ti <sub>3</sub> C <sub>2</sub> T <sub>x</sub> /ANFs | 0.023          | 158.5                  | 12.74   | This work |
| [21]   | 40 wt% d-Ti <sub>3</sub> C <sub>2</sub> T <sub>x</sub> /ANFs | 0.022          | 136.5                  | 19.43   |           |
| [22]   | 50 wt% d-Ti <sub>3</sub> C <sub>2</sub> T <sub>x</sub> /ANFs | 0.020          | 83.9                   | 23.97   |           |
| [23]   | 60 wt% d-Ti <sub>3</sub> C <sub>2</sub> T <sub>x</sub> /ANFs | 0.017          | 80.1                   | 28.54   |           |

## REFERENCES

1. Z. Lu, N. T. Alvarez, M. Zhang, M. Haase, R. Malik, D. Mast and V. Shanov, *Carbon*, 2015, **82**, 353-359.
2. Z. Zeng, H. Jin, M. Chen, W. Li, L. Zhou, X. Xue and Z. Zhang, *Small*, 2017, **13**, 1701388.
3. F. Kazushige, G. Mayakrishnan, K. Han-Ki, K. Byoung Suhk and K. Ick Soo, *J Nanosci Nanotechnol*, 2013, **13**, 1759-1764.
4. J. H. Lin, Z. I. Lin, Y. J. Pan, C. K. Chen, C. L. Huang, C. H. Huang and C. W. Lou, *Macromolecular Materials and Engineering*, 2015, **301**, 199-211.
5. W. T. Cao, F. F. Chen, Y. J. Zhu, Y. G. Zhang and F. Chen, *Acs Nano*, 2018, **12**, 4583-4593.
6. J. Chen, J. Xu, K. Wang, X. Qian and R. Sun, *Acs Applied Materials & Interfaces*, 2015, **7**, 15641.
7. B. Yuan, C. Bao, X. Qian, S. Lei, Q. Tai, K. M. Liew and H. Yuan, *Carbon*, 2014, **75**, 178-189.
8. H. B. Zhang, Q. Yan, W. G. Zheng, Z. He and Z. Z. Yu, *Acs Applied Materials & Interfaces*, 2011, **3**, 918.
9. P. Verma, P. Saini, R. S. Malik and V. Choudhary, *Carbon*, 2015, **89**, 308-317.
10. A. P. Sobha, P. S. Sreekala and S. K. Narayanankutty, *Progress in Organic Coatings*, 2017, **113**, 168-174.
11. S. G. Pardo, L. Arboleda, A. Ares, X. Garcia, S. Dopico and M. J. Abad, *Polymer Composites*, 2013, **34**, 1938-1949.
12. F. Sharif, M. Arjmand, A. A. Moud, U. Sundararaj and E. P. Roberts, *Acs Applied Materials & Interfaces*, 2017, **9**, 14171-14179.
13. M. H. Al Saleh and U. Sundararaj, *Journal of Polymer Science Part B*, 2012, **50**, 1356-1362.
14. L. C. Jia, M. Z. Li, D. X. Yan, C. H. Cui, H. Y. Wu and Z.-M. Li, *Journal of Materials Chemistry C*, 2017, **5**, 8944-8951.
15. Y. J. Wan, P. L. Zhu, S. H. Yu, R. Sun, C. P. Wong and W. H. Liao, *Carbon*, 2017, **122**, 74-81.
16. S. Pande, B. P. Singh, R. B. Mathur, T. L. Dhami, P. Saini and S. K. Dhawan, *Nanoscale Research Letters*, 2009, **4**, 327-334.
17. T. K. Gupta, B. P. Singh, S. R. Dhakate, V. N. Singh and R. B. Mathur, *Journal of Materials Chemistry A*, 2013, **1**, 9138.
18. J. D. Sudha, S. Sivakala, K. Patel and P. R. Nair, *Composites Science & Technology*, 2010, **69**, 358-364.
19. S. P. Gamage, K. Yang, R. Braveenth, K. Raagulan, H. Kim, L. Yun, C. M. Yang, J. Moon and K. Chai, *Materials*, 2017, **10**, 1350.
